# Supplementary material for: Scalable synthesis of organic-soluble carbon quantum dots: superior optical properties in solvents, solids, and LEDs
Source: Royal Society of Chemistry journal article supplement (doi:10.1039/c7nr04718e), 2017-01-01
Supplement: c7nr04718e1.pdf [file c7nr04718e1.pdf]

## Supporting Information

### **Scalable synthesis of organic-soluble carbon quantum dots: superior optical properties in solvents, solids, and LEDs**

Minghong Wu,<sup>a</sup> Jing Zhan,<sup>a</sup> Bijiang Geng,<sup>b</sup> Piaopiao He,<sup>c</sup> Kuan Wu,<sup>a</sup> Liang Wang,<sup>d</sup>  
Gang Xu,<sup>a</sup> Luqiao Yin<sup>\*,c</sup> and Dengyu Pan<sup>\*,b,d</sup>

<sup>a</sup>Shanghai Applied Radiation Institute, School of Environmental and Chemical Engineering, Shanghai University, Shanghai 200444, PR ChinaAddress here.

<sup>b</sup>Department of Chemical Engineering, School of Environmental and Chemical Engineering, Shanghai University, Shanghai 200444, PR China

<sup>c</sup>Key Laboratory of Advanced Display and System Applications, Shanghai University, Shanghai, 200072, PR China

<sup>d</sup>Institute of Nanochemistry and Nanobiology, Shanghai University, Shanghai 200444, PR China

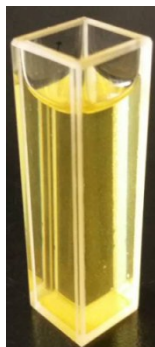

**Fig. S1** Photograph of a clear, yellow TNP solution in toluene.

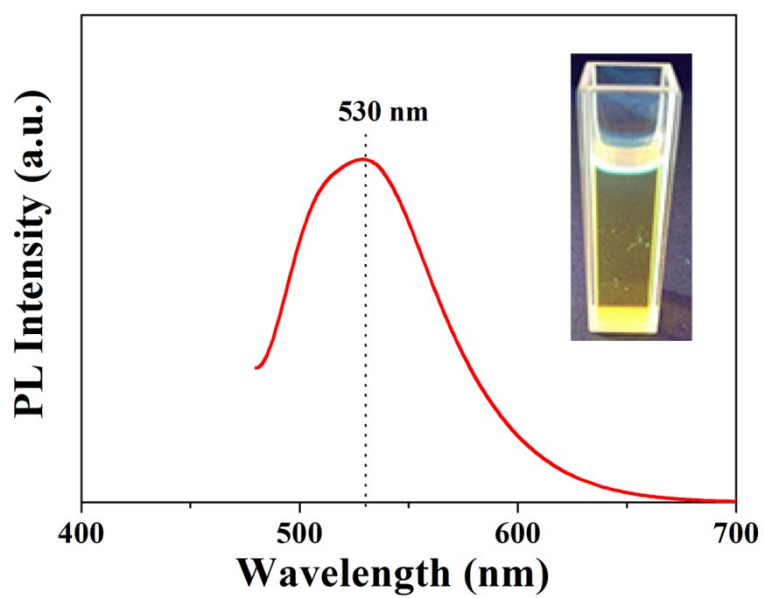

**Fig. S2** Fluorescent spectrum of a product via solvothermal treatment of pristine pyrene in toluene at 180 °C for 12h (Inset: photograph of this product solution under UV irradiation).

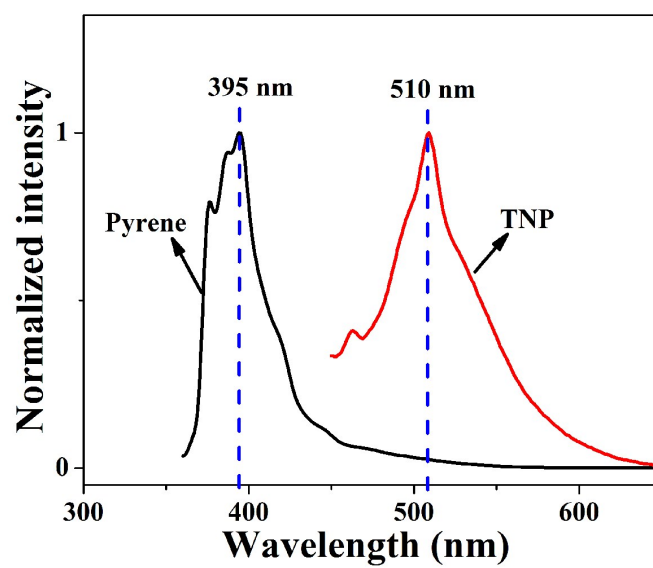

**Fig. S3** Normalized PL spectra of pyrene and TNP in toluene solutions.

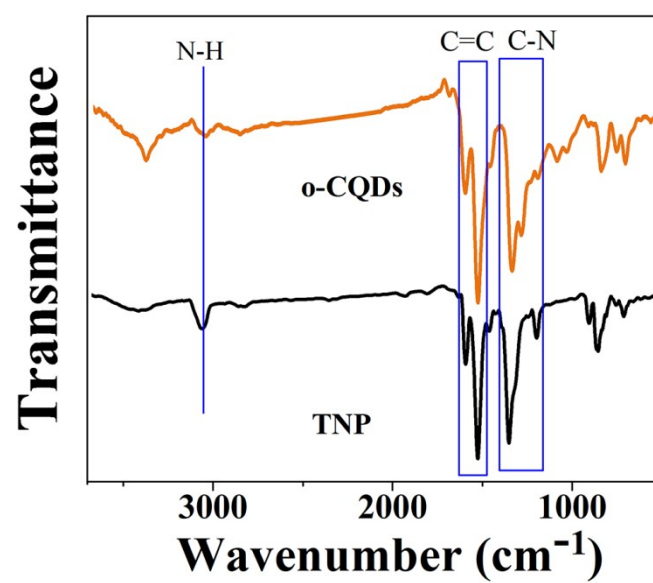

**Fig. S4** The FT-IR spectra of o-CQDs.

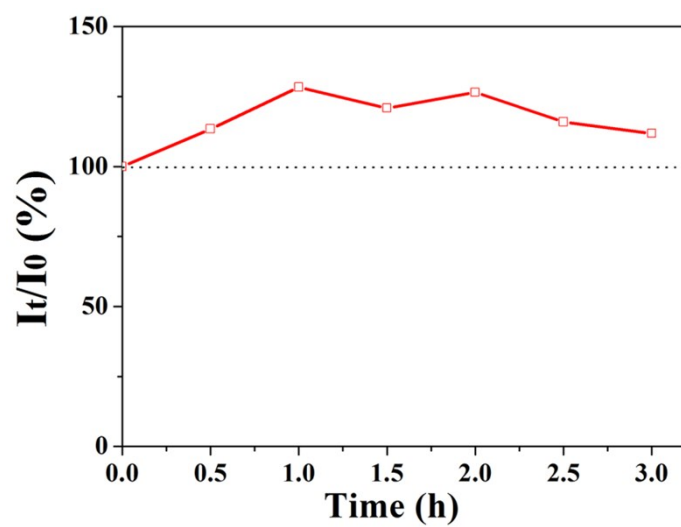

**Fig. S5** Photostability test of o-GQDs under a 365-nm UV light (100 W).
